# Supplementary material for: A SARS-CoV-2 NSP7 homolog of a Treg epitope suppresses CD4+ and CD8+ T cell memory responses
Source: PubMed Central journal article supplement (PMC10731459; doi:10.3389/fimmu.2023.1290688), 2023-11-24
Supplement: DataSheet_1.pdf [file DataSheet_1.pdf]

**Supplemental Data for:**

**A SARS-CoV-2 NSP7 homolog of a Treg epitope suppresses CD4+ and CD8+ T cell memory responses**

Shah Md. Shahjahan Miah , Sandra Lelias , Andres H. Gutierrez, Mitchell McAllister, Christine M. Boyle, Lenny Moise, Anne S. De Groot

**Supplementary Table 1.** Healthy donors used in Bystander Supression Assays (BSA).

| Donor | Allele 1 | Allele 2 | Gender | Age | Donor | Allele 1 | Allele 2 | Gender | Age |
|-------|----------|----------|--------|-----|-------|----------|----------|--------|-----|
| EV202 | *0301    | *1501    | Female | 36  | EV327 | *0405    | *1401    | Male   | 54  |
| EV229 | *0101    | *0301    | Male   | 20  | EV329 | *1201    | *1501    | Female | 49  |
| EV277 | *1401    | *1501    | Male   | 54  | EV354 | *0101    | *1301    | Male   | 48  |
| EV279 | *0701    | *1101    | Male   | 71  | EV366 | *0406    | *1601    | Female | 54  |
| EV285 | *0101    | *1302    | Female | 54  | EV375 | *0301    | *1501    | Female | 46  |
| EV292 | *0301    | *1301    | Male   | 57  | EV381 | *0301    | *1303    | Female | 57  |
| EV299 | *0301    | *0701    | Male   | 67  | EV545 | *0401    | *0701    | Male   | 40  |
| EV318 | *0402    | *0701    | Male   | 69  | EV546 | *1101    | *1501    | Female | 34  |
| EV320 | *0701    | *0701    | Male   | 51  |       |          |          |        |     |

**Supplementary Table 1.** Healthy blood donors collected from Rhode Island Blood Center from whom we have isolated PBMCs and stored at liquid N2 before use. The effect of Tregitope peptides and newly identified SARS-CoV-2-NSP7-homolog of 289 Tregitope were tested using our in vitro bystander suppression assays. HLA DRB1 of donor PBMCs were typed at American Red Cross in Dedham, MA. **41% percent of the donors were female, 59% were male. The age range of donors are 20 to 69.**

**Supplementary Table 2.** Convalescent COVID-19 donors used in CPI BSA.

| Donor | Allele 1 | Allele 2 | Gender | Age |
|-------|----------|----------|--------|-----|
| CV001 | *0701    | *1101    | Female | 56  |
| CV003 | *1502    | *1502    | Female | 57  |
| CV020 | *1301    | *1501    | Male   | 40  |
| L009  | *0401    | *1201    | Female | 54  |
| L011  | *0301    | *1101    | Female | 28  |
| L013  | *0801    | *1303    | Female | 43  |
| L014  | *0101    | *1401    | Male   | 37  |

**Supplementary Table 2.** List of the convalescent COVID-19 blood donors whom we have isolated PBMCs and stored at liquid N2 before use. The effect of Tregitope peptides and newly identified SARS-CoV2-NSP7-homolog of 289 Tregitope were tested using our in vitro CPI bystander suppression assay. HLA DRB1 of donor PBMCs were typed at American Red Cross in Dedham, MA. **72% percent of the donors were female, 28% were male. The age range of donors are 28 to 57.**

CPI = a mixture of protein antigens from the cytomegalovirus, influenza, and parainfluenza.

**Supplement Figure S1.** Overview of Class II JanusMatrix Results of the SARS-CoV-2 NSP7- homolog of Tregitope 289 peptide.

| Input Sequence  | Cluster Address (w/ Flanks) | Cluster Sequence | EpiMatrix Cluster Score (w/o Flanks) | Treg-Adj Cluster Score (w/o Flanks) | Number of HUMAN Matches | Janus Homology Score  |
|-----------------|-----------------------------|------------------|--------------------------------------|-------------------------------------|-------------------------|-----------------------|
| NSP7_289HOMOLOG | 50 - 62                     | EKMVSLLSVLLSM    | 31.97                                | 31.97                               | 74                      | <a href="#">11.44</a> |

| Protein ID                                | Protein Description                    | Start Position          | Sequence      | Cluster Score | Number Of HUMAN Matches* | Janus HMLGY Score | DB Ver: April 02, 2023 |            |            | EpiMatrix Ver: 1.2 with DR9 |            |            | JMX Hit Threshold: 1.64 |            |            |
|-------------------------------------------|----------------------------------------|-------------------------|---------------|---------------|--------------------------|-------------------|------------------------|------------|------------|-----------------------------|------------|------------|-------------------------|------------|------------|
|                                           |                                        |                         |               |               |                          |                   | DRB1 *0101             | DRB1 *0301 | DRB1 *0401 | DRB1 *0701                  | DRB1 *0801 | DRB1 *0901 | DRB1 *1101              | DRB1 *1301 | DRB1 *1501 |
| <a href="#">NSP7_289HOMOLOG</a>           |                                        | <a href="#">50 - 62</a> | EKMVSLLSVLLSM | 31.97         | <a href="#">73</a>       | 11.44             |                        |            |            |                             |            |            |                         |            |            |
|                                           |                                        | 50                      | EKMVSLLSV     |               | 0                        |                   | 0.23                   | 0.48       | 0.19       | 0.99                        | 0.13       | 1.09       | 1.11                    | 0.83       | 1.27       |
|                                           |                                        | 51                      | KMVSLLSVL     |               | 0                        |                   | -0.08                  | 0.94       | -0.51      | 0.73                        | -0.3       | 1.15       | 0.09                    | 0.49       | 0.68       |
|                                           |                                        | 52                      | MVSLLSVLL     |               | <a href="#">20</a>       | F52               | 3.12                   | 2.25       | 2.42       | 2.97                        | 2.18       | 2.08       | 1.74                    | 2.43       | 2.84       |
| <a href="#">sp Q9C0C7 AMRA1_HUMAN</a>     | Activating molecule in BECN1-regula... | 444                     | SVSLLSVLR     |               |                          |                   | 1.79                   | 1.61       | 1.48       | 1.17                        | 1.67       | 0.83       | 0.74                    | 1.8        | 1.49       |
| <a href="#">sp IQ00206 TLR4_HUMAN</a>     | Toll-like receptor 4                   | 635                     | GVSVLSVLI     |               |                          |                   | 1.55                   | 0.87       | 1.15       | 1.99                        | 0.32       | 1.52       | 0.51                    | 1.06       | 1.48       |
| <a href="#">sp Q13873 BMPR2_HUMAN</a>     | Bone morphogenetic protein receptor... | 157                     | SVSVLAVLI     |               |                          |                   | 1.71                   | 1.57       | 0.91       | 1.8                         | 0.71       | 1.77       | 0.41                    | 1.74       | 1.57       |
| <a href="#">sp P01861 IGHG4_HUMAN</a>     | Immunoglobulin heavy constant gamma... | 182                     | VSVL VLV      |               |                          |                   | 1.68                   | 1.85       | 2.42       | 1.38                        | 2.1        | 1.9        | 1.67                    | 2.02       | 1.52       |
| <a href="#">sp P01860 IGHG3_HUMAN</a>     | Immunoglobulin heavy constant gamma... | 232                     | VSVL VLV      |               |                          |                   | 1.68                   | 1.85       | 2.42       | 1.38                        | 2.1        | 1.9        | 1.67                    | 2.02       | 1.52       |
| <a href="#">sp P01857 IGHG1_HUMAN</a>     | Immunoglobulin heavy constant gamma... | 185                     | VSVL VLV      |               |                          |                   | 1.68                   | 1.85       | 2.42       | 1.38                        | 2.1        | 1.9        | 1.67                    | 2.02       | 1.52       |
| <a href="#">sp Q8NGI9 OR5A2_HUMAN</a>     | Olfactory receptor 5A2                 | 209                     | IVSVLVVLI     |               |                          |                   | 2.27                   | 2.35       | 1.81       | 2.57                        | 1.56       | 2.57       | 1.25                    | 2.51       | 1.57       |
| <a href="#">sp Q5XP14 RN123_HUMAN</a>     | E3 ubiquitin-protein ligase RNF123     | 1078                    | SVSLLEVLE     |               |                          |                   | 0.65                   | 1.42       | -0.14      | 0.16                        | 2.04       | -0.22      | 0.58                    | 1.61       | 0.4        |
| <a href="#">sp P78395 PRAME_HUMAN</a>     | Melanoma antigen preferentially exp... | 347                     | SVSQLSVLS     |               |                          |                   | 1.9                    | 1.59       | 2.04       | 0.85                        | 1.42       | 0.46       | 1.29                    | 2.27       | 1.69       |
| <a href="#">sp Q05707 COEA1_HUMAN</a>     | Collagen alpha-1(XIV) chain            | 690                     | EVSLLAFLD     |               |                          |                   | 1.42                   | 0.23       | 0.89       | 0.98                        | 1.92       | 0.55       | 0.27                    | 0.45       | 0.52       |
| <a href="#">sp P49796 RG53_HUMAN</a>      | Regulator of G-protein signaling 3     | 81                      | HVSVLSVLS     |               |                          |                   | 1.86                   | 1.31       | 1.92       | 1.45                        | 1.21       | 1.59       | 1.32                    | 1.49       | 1.64       |
| <a href="#">sp Q9BXR5 TLR10_HUMAN</a>     | Toll-like receptor 10                  | 70                      | SVSKLVLI      |               |                          |                   | 0.62                   | 1.76       | -0.86      | 0.98                        | 1.63       | 0.53       | 0.33                    | 2.17       | 0.37       |
| <a href="#">sp Q8NCM8 DYHC2_HUMAN</a>     | Cytoplasmic dynein 2 heavy chain 1     | 3785                    | VVSLVLE       |               |                          |                   | 0.47                   | 1.25       | 1.45       | 1                           | 1.29       | 0.83       | 0.27                    | 2.21       | 0.61       |
| <a href="#">sp Q5TH69 BIG3_HUMAN</a>      | Brefeldin A-inhibited guanine nucle... | 206                     | VVSVLTVLC     |               |                          |                   | 2                      | 1.24       | 1.81       | 1.77                        | 1.42       | 1.73       | 1.03                    | 1.42       | 1.84       |
| <a href="#">sp Q75746 S2512_HUMAN</a>     | Electrogenic aspartate/glutamate an... | 465                     | RVSAENVLR     |               |                          |                   | 1.26                   | 2.34       | 1.33       | 0.66                        | 1.36       | 1.58       | 0.09                    | 2.28       | 1.69       |
| <a href="#">sp Q9HB89 NMUR1_HUMAN</a>     | Neuromedin-U receptor 1                | 103                     | AVSDDLVL      |               |                          |                   | 0.12                   | 1.83       | 0.42       | -0.16                       | 0.35       | 0.27       | -0.66                   | 0.71       | 0.3        |
| <a href="#">sp Q9GZQ4 NMUR2_HUMAN</a>     | Neuromedin-U receptor 2                | 88                      | AVSDDLVL      |               |                          |                   | 0.12                   | 1.83       | 0.42       | -0.16                       | 0.35       | 0.27       | -0.66                   | 0.71       | 0.3        |
| <a href="#">sp Q6NW34 NEPRO_HUMAN</a>     | Nucleolus and neural progenitor pro... | 179                     | LVSRVNVLI     |               |                          |                   | 0.82                   | 1          | 0.2        | 0.88                        | 0.45       | 0.58       | -0.04                   | 2.03       | 1.25       |
| <a href="#">sp Q9Y51 PCDAB_HUMAN</a>      | Protocadherin alpha-11                 | 705                     | VVSSLVLI      |               |                          |                   | 1.25                   | 1.65       | 1.02       | 1.55                        | 1.2        | 2.2        | 1.27                    | 1.28       | 1.89       |
| <a href="#">sp Q8NCA5 FA98A_HUMAN</a>     | Protein FAM98A                         | 49                      | LVSELRVLC     |               |                          |                   | 1.99                   | 1.63       | 0.86       | 1.24                        | 1.13       | 0.9        | 1                       | 1.38       | 0.92       |
|                                           |                                        | 53                      | VSLLSVLLS     |               | <a href="#">36</a>       | F53               | 2.09                   | 1.68       | 2.59       | 1.44                        | 1.89       | 1.25       | 2.47                    | 2.03       | 1.58       |
| <a href="#">sp P30408 T4S1_HUMAN</a>      | Transmembrane 4 L6 family member 1     | 160                     | VSLFSLLA      |               |                          |                   | 0.38                   | 0.47       | 1.57       | 1.1                         | 0.85       | 1.32       | 1.44                    | 1.83       | 1.88       |
| <a href="#">sp IQ5VT06 CE350_HUMAN</a>    | Centrosome-associated protein 350      | 756                     | GSLLSHLLS     |               |                          |                   | 0.8                    | 0.68       | 1.21       | 0.16                        | 1.07       | 0.04       | 1.68                    | 1.04       | 1.49       |
| <a href="#">sp IQ9NX18 SDHF2_HUMAN</a>    | Succinate dehydrogenase assembly fa... | 19                      | HSLLSFLLS     |               |                          |                   | 1.7                    | 0.8        | 1.84       | 0.91                        | 1.33       | 0.89       | 1.93                    | 1.16       | 1.29       |
| <a href="#">sp IQ5JRX3 PREP_HUMAN</a>     | Presequence protease, mitochondrial    | 346                     | LSLSSLLT      |               |                          |                   | 2.66                   | 0.97       | 2.57       | 2.61                        | 1.89       | 1.84       | 2.4                     | 1.32       | 2.8        |
| <a href="#">sp Q76KD6 SPERI_HUMAN</a>     | Speriolin                              | 193                     | VLSLSPFLS     |               |                          |                   | 1.97                   | 2.4        | 2.2        | 1.78                        | 1.31       | 2.31       | 2.23                    | 2.17       | 2.04       |
| <a href="#">sp P13866 SC5A1_HUMAN</a>     | Sodium/glucose cotransporter 1         | 145                     | LSLSSLVLI     |               |                          |                   | 0.93                   | 1.99       | 0.95       | 0.44                        | 0.99       | 1.22       | 1.78                    | 2.33       | 1.88       |
| <a href="#">sp Q96M86 DNHD1_HUMAN</a>     | Dynein heavy chain domain-containin... | 1568                    | TSLLSALLV     |               |                          |                   | 1.76                   | 0.38       | 1.46       | 1.74                        | 0.71       | 0.94       | 1.38                    | 0.75       | 1.34       |
| <a href="#">sp Q9Y4D7 PLXD1_HUMAN</a>     | Plexin-D1                              | 1410                    | ISLFSLLN      |               |                          |                   | 1.68                   | 0.39       | 2.22       | 1.71                        | 1.86       | 1.73       | 1.74                    | 1.75       | 2.89       |
| <a href="#">sp Q9GZU5 NYX_HUMAN</a>       | Nyctalopin                             | 414                     | SLLSKLLA      |               |                          |                   | 0.71                   | 1.18       | 0.66       | -0.1                        | 1.2        | 0.71       | 1.96                    | 1.54       | 1.42       |
| <a href="#">sp P59826 BPIB3_HUMAN</a>     | BPI fold-containing family B member... | 167                     | ISLFSGLLP     |               |                          |                   | 1.07                   | 0.06       | 1.78       | 0.83                        | 0.88       | 1.68       | 1.22                    | 1.43       | 1.85       |
| <a href="#">sp P40197 GPV_HUMAN</a>       | Platelet glycoprotein V                | 207                     | VSLDSGLN      |               |                          |                   | 1.33                   | 1.35       | 1.89       | 0.4                         | 0.79       | 0.84       | 0.24                    | 0.39       | 0.91       |
| <a href="#">sp A0A1B0GUA7 TEX51_HUMAN</a> | Testis-expressed protein 51            | 142                     | VLSLSSALL     |               |                          |                   | 2.3                    | 2.4        | 1.89       | 2.81                        | 1.07       | 2.45       | 1.75                    | 2.18       | 2.44       |
| <a href="#">sp P19021 AMD_HUMAN</a>       | Peptidyl-glycine alpha-amidating mo... | 391                     | YSLLSKLLG     |               |                          |                   | 2.12                   | 2.03       | 1.95       | 0.63                        | 3.26       | 1.7        | 3.32                    | 2.37       | 2.28       |
| <a href="#">sp Q9C0J3 CCSE1_HUMAN</a>     | Serine-rich coiled-coil domain-cont... | 240                     | SSLQSPFLS     |               |                          |                   | 1.25                   | 1.1        | 1.55       | 0.32                        | 0.92       | 0.14       | 1.58                    | 1.95       | 1.27       |
| <a href="#">sp Q96RG2 PASK_HUMAN</a>      | PAS domain-containing serine/threon... | 1225                    | MSLVSGLLQ     |               |                          |                   | 1.63                   | 1.03       | 1.96       | 1.62                        | 0.96       | 1.26       | 1.81                    | 1.37       | 1.88       |
| <a href="#">sp Q14497 AR1A_HUMAN</a>      | AT-rich interactive domain-containi... | 1674                    | MSLKSGLLA     |               |                          |                   | 1.1                    | 1.12       | 1.02       | 1.05                        | 1.15       | 0.91       | 1.22                    | 1.7        | 0.97       |
| <a href="#">sp Q62P01 RBM44_HUMAN</a>     | RNA-binding protein 44                 | 683                     | LSLESKLLS     |               |                          |                   | 1.49                   | 2.42       | 1.72       | 0.28                        | 1.3        | 1.19       | 2.44                    | 2.31       | 1.4        |

| Protein ID                            | Protein Description                    | Start Position | Sequence          | Cluster Score | Number Of HUMAN Matches* | Janus HMLGY Score | DRB1 *0101 | DRB1 *0301 | DRB1 *0401 | DRB1 *0701 | DRB1 *0801 | DRB1 *0901 | DRB1 *1101 | DRB1 *1301 | DRB1 *1501 |
|---------------------------------------|----------------------------------------|----------------|-------------------|---------------|--------------------------|-------------------|------------|------------|------------|------------|------------|------------|------------|------------|------------|
| <a href="#">sp Q9Y243 AKT3_HUMAN</a>  | RAC-gamma serine/threonine-protein ... | 374            | <u>KSLLSGLLI</u>  |               |                          |                   | 1.95       | 0.75       | 1.19       | 1.51       | 0.7        | 1.02       | 0.89       | 1.11       | 1.55       |
| <a href="#">sp Q8NFD5 AR1B_HUMAN</a>  | AT-rich interactive domain-containi... | 1711           | <u>MSLKSGLLA</u>  |               |                          |                   | 1.1        | 1.12       | 1.02       | 1.05       | 1.15       | 0.91       | 1.22       | 1.7        | 0.97       |
| <a href="#">sp Q8N755 S66A3_HUMAN</a> | Solute carrier family 66 member 3      | 37             | <u>LSLPSLLE</u>   |               |                          |                   | -0.95      | 1.1        | -0.09      | -0.45      | 1.02       | -0.42      | 0.16       | 1.89       | 0.74       |
| <a href="#">sp Q6Z581 WDFY4_HUMAN</a> | WD repeat- and FYVE domain-containi... | 1481           | <u>LSLFSHLE</u>   |               |                          |                   | 0.12       | 0.95       | 1.01       | 0.33       | 2.03       | 0.46       | 1.18       | 2.3        | 1.99       |
| <a href="#">sp Q5TEC3 ZN697_HUMAN</a> | Zinc finger protein 697                | 326            | <u>FSLSSHLLS</u>  |               |                          |                   | 1.93       | 2.7        | 2.4        | 1.88       | 1.95       | 2.33       | 2.86       | 2.47       | 2.64       |
| <a href="#">sp Q8TBY8 PMFBP_HUMAN</a> | Polyamine-modulated factor 1-bindin... | 13             | <u>SSLNSKLLS</u>  |               |                          |                   | 0.51       | 1.69       | 0.71       | -0.51      | 1.4        | 0.28       | 2.01       | 1.82       | 1.2        |
| <a href="#">sp P55290 CAD13_HUMAN</a> | Cadherin-13                            | 697            | <u>FSLPSVLLL</u>  |               |                          |                   | 1.51       | 1.51       | 1.89       | 2.05       | 1.04       | 1.33       | 1.19       | 2.29       | 1.41       |
| <a href="#">sp Q4KMG0 CDON_HUMAN</a>  | Cell adhesion molecule-related/down... | 85             | <u>LSLNSSLLG</u>  |               |                          |                   | 2.18       | 2.06       | 2.55       | 1.43       | 2.27       | 1.18       | 2.38       | 2.18       | 2.31       |
| <a href="#">sp A6ND91 ASPDH_HUMAN</a> | Aspartate dehydrogenase domain-cont... | 19             | <u>QSLVSELLA</u>  |               |                          |                   | 0.73       | 0.74       | 0.31       | 0.74       | 0.62       | 0.89       | 1.68       | 1.08       | 0.89       |
| <a href="#">sp P55198 AF17_HUMAN</a>  | Protein AF-17                          | 541            | <u>LSLSEPLLQ</u>  |               |                          |                   | 2.01       | 1.79       | 2.27       | 0.91       | 1.09       | 1.17       | 1.75       | 1.69       | 1.13       |
| <a href="#">sp Q96MX3 ZNF48_HUMAN</a> | Zinc finger protein 48                 | 368            | <u>FSLSSTLLR</u>  |               |                          |                   | 2.04       | 2.8        | 2.49       | 2.07       | 1.9        | 2.29       | 2.06       | 2.57       | 1.85       |
| <a href="#">sp Q9BV99 LRC61_HUMAN</a> | Leucine-rich repeat-containing prot... | 28             | <u>FSLESILLL</u>  |               |                          |                   | 1.73       | 1.77       | 1.99       | 2.62       | 0.62       | 1.62       | 1.54       | 1.67       | 1.13       |
| <a href="#">sp Q9NUD9 PIGV_HUMAN</a>  | GPI mannosyltransferase 2              | 109            | <u>LSLRSCLLI</u>  |               |                          |                   | 0.78       | 0.68       | 0.82       | 1.26       | 0.99       | 0.67       | 0.65       | 1.88       | 1.1        |
| <a href="#">sp Q9JPM8 AP4E1_HUMAN</a> | AP-4 complex subunit epsilon-1         | 846            | <u>FSLTSELLD</u>  |               |                          |                   | 0.42       | 0.18       | 0.44       | 1.57       | 1.85       | 0.91       | 0.33       | 1.14       | 0.91       |
| <a href="#">sp Q68CQ1 MROH7_HUMAN</a> | Maestro heat-like repeat-containing... | 337            | <u>LSLDSSELLF</u> |               |                          |                   | 1.19       | 2.71       | 2.57       | 1.6        | 1.27       | 1.57       | 1.02       | 1.73       | 1.15       |
| <a href="#">sp Q8NH41 OR4K1_HUMAN</a> | Olfactory receptor 4K15                | 206            | <u>LSLSSFLLL</u>  |               |                          |                   | 1.18       | 1.88       | 0.94       | 2.29       | 0.6        | 1.58       | 1.3        | 1.66       | 1.44       |
| <a href="#">sp Q14771 ZN213_HUMAN</a> | Zinc finger protein 213                | 410            | <u>FSLRSYLLD</u>  |               |                          |                   | 1.22       | -0.31      | -0.11      | 1.23       | 1.75       | 0.43       | 0.36       | 0.91       | 1.16       |
| <a href="#">sp Q43286 B4GT5_HUMAN</a> | Beta-1,4-galactosyltransferase 5       | 22             | <u>FSLSSLLY</u>   |               |                          |                   | 2.24       | 2.94       | 2.29       | 2.33       | 0.92       | 2.94       | 2.03       | 2.71       | 2.31       |
| <a href="#">sp Q8N6C8 LIRA3_HUMAN</a> | Leukocyte immunoglobulin-like recep... | 208            | <u>WSLPSDLLG</u>  |               |                          |                   | 0.39       | 0.17       | 1.92       | 0.05       | 1.15       | -0.06      | 1.06       | 0.98       | 1.11       |
|                                       |                                        | 54             | <u>SLLSVLLSM</u>  |               | 17                       | F54               | 0.08       | 1.81       | 0.03       | 0.58       | -0.44      | 1.52       | 0.74       | 1.6        | 1.25       |
| <a href="#">sp Q9Y6C5 PTC2_HUMAN</a>  | Protein patched homolog 2              | 1105           | <u>VLLPEVLLSI</u> |               |                          |                   | 0.3        | 1.73       | 0.47       | 0.89       | 0.76       | 1.01       | 0.74       | 2.51       | 2.03       |
| <a href="#">sp Q60241 AGR2_HUMAN</a>  | Adhesion G protein-coupled receptor... | 19             | <u>LLLSVILSL</u>  |               |                          |                   | 1.53       | 2.31       | 1.65       | 3.05       | 1.05       | 2.61       | 1.73       | 2.09       | 2.04       |
| <a href="#">sp Q9P2K9 DISP3_HUMAN</a> | Protein dispatched homolog 3           | 1207           | <u>LLLPVLLSI</u>  |               |                          |                   | 0.43       | 1.79       | 0.59       | 1.01       | 0.9        | 1.13       | 0.87       | 2.56       | 2.08       |
| <a href="#">sp Q86Y46 K2C73_HUMAN</a> | Keratin, type II cytoskeletal 73       | 419            | <u>ELLSVKLSL</u>  |               |                          |                   | 0.99       | 1.86       | 0.42       | 1.18       | 0.94       | 1.93       | 1.62       | 1.64       | 1.46       |
| <a href="#">sp Q60423 AT8B3_HUMAN</a> | Phospholipid-transporting ATPase I     | 1189           | <u>LLLVLLSV</u>   |               |                          |                   | 1.28       | 1.89       | 1.21       | 2.03       | 1.24       | 2.19       | 1.28       | 2.21       | 2.61       |
| <a href="#">sp A4D0T7 SIM30_HUMAN</a> | Small integral membrane protein 30     | 33             | <u>LLLGVLVSI</u>  |               |                          |                   | 1.65       | 2.2        | 1.76       | 1.98       | 1.01       | 1.68       | 1.18       | 1.86       | 1.59       |
| <a href="#">sp Q8IWT1 SCN4B_HUMAN</a> | Sodium channel subunit beta-4          | 23             | <u>FLLPVLVSL</u>  |               |                          |                   | 2.06       | 2          | 2.57       | 2.38       | 1.55       | 1.76       | 1.69       | 2.78       | 2.4        |
| <a href="#">sp Q15166 PON3_HUMAN</a>  | Serum paraoxonase/lactonase 3          | 8              | <u>LLGVGLSL</u>   |               |                          |                   | 2.11       | 1.79       | 1.73       | 1.92       | 0.69       | 1.45       | 1.05       | 1.46       | 2.4        |
| <a href="#">sp Q9NTG1 PKDRE_HUMAN</a> | Polycystin family receptor for egg ... | 8              | <u>LLGVGLSL</u>   |               |                          |                   | 2.24       | 1.84       | 1.85       | 2.04       | 0.82       | 1.58       | 1.18       | 1.51       | 2.45       |
| <a href="#">sp Q9BUM1 G6PC3_HUMAN</a> | Glucose-6-phosphatase 3                | 153            | <u>FLLAVGLSR</u>  |               |                          |                   | 2.55       | 2.57       | 2.47       | 2.03       | 2.24       | 2.74       | 1.72       | 2.66       | 2.48       |
| <a href="#">sp Q86TG1 T150A_HUMAN</a> | Transmembrane protein 150A             | 5              | <u>LLPVSLSA</u>   |               |                          |                   | 1.56       | 1.72       | 2.33       | 1.73       | 1.07       | 1.56       | 1.62       | 2.5        | 2.42       |
| <a href="#">sp P04118 COL_HUMAN</a>   | Colipase                               | 6              | <u>ILLVVALSV</u>  |               |                          |                   | 3.02       | 2.02       | 2.67       | 2.98       | 2.02       | 2.33       | 2.66       | 2.36       | 2.91       |
| <a href="#">sp H3BQJ8 LY6L_HUMAN</a>  | Lymphocyte antigen 6L                  | 125            | <u>LLLVQGLSL</u>  |               |                          |                   | 2.82       | 1.91       | 2.25       | 2.25       | 1.56       | 1.44       | 1.95       | 2.74       | 2.61       |
| <a href="#">sp P39060 COI1_HUMAN</a>  | Collagen alpha-1(XVIII) chain          | 534            | <u>VLLGVLSG</u>   |               |                          |                   | 0.98       | 2.39       | 1.16       | -0.27      | 1.99       | 1.07       | 2.09       | 2.04       | 2.21       |
| <a href="#">sp O15120 PLCB_HUMAN</a>  | 1-acyl-sn-glycerol-3-phosphate acyl... | 14             | <u>LLLVQLSR</u>   |               |                          |                   | 1.85       | 1.82       | 1.29       | 1.4        | 1.95       | 1.44       | 1.78       | 2.16       | 1.4        |
| <a href="#">sp Q14667 BLTP2_HUMAN</a> | Bridge-like lipid transfer protein ... | 10             | <u>VLLVVALSA</u>  |               |                          |                   | 2.64       | 1.96       | 2.73       | 2.13       | 1.98       | 2.05       | 2.72       | 2.3        | 2.61       |
| <a href="#">sp Q95994 AGR2_HUMAN</a>  | Anterior gradient protein 2 homolog    | 9              | <u>FLLVLSY</u>    |               |                          |                   | 2.9        | 2.65       | 2.7        | 2.12       | 1.92       | 2.58       | 2.69       | 2.97       | 2.57       |

\* Count of HUMAN JanusMatrix matches found in the search database. With respect to a given EpiMatrix Hit (a 9-mer contained within the input sequence which is predicted to bind to a specific allele), a Janus Matrix match is a 9-mer derived from the search database (typically the human genome) which is predicted to bind to the same allele as the EpiMatrix Hit and shares TCR facing contacts with the EpiMatrix Hit.

\*\* Janus Homology Score represents the average depth of coverage in the search database for each EpiMatrix hit in the input sequence. For example, an input peptide with eight EpiMatrix hits, all of which have one match in the search database, has a Janus Homology Score of 1. An input peptide with four EpiMatrix Hits, all of which have two matches in the search database, has a Janus Homology Score of 2.

The JanusMatrix Homology Score considers all constituent 9-mers in any given peptide, including flanks.

**Supplement Figure S1. JanusMatrix Analysis of the SARS-CoV-2 NSP7- homolog of Tregitope 289 peptide.** The JanusMatrix algorithm evaluates predicted MHC class II T cell epitopes for their homology to the human proteome. Here we observed that the NSP7 peptide (50-62) has shared homology to some common human protein sequences with a total of 73 human matches. Three epitopes were identified in frames 52, 53 and 54 that show significant cross-conservation. As shown in the above report frame 52 has 100% homology at the TCR-face (homologous amino acids are underlined) which corresponds to the well- characterized regulatory epitope, Tregitope 289, that is present in the constant region of human immunoglobulin (the 9-mer epitope is shown in the green box). Tregitope regulatory epitopes are highlighted in green in this report, and frames that predict binding across multiple alleles ( $\geq 4$ ) are considered promiscuous epitopes and have a higher likelihood to impact a larger global population. Additionally, there is cross-conservation in frames 53 and 54, having 36 and 17 human matches, respectively; these epitopes may be contributing to the HLA binding and the suppressive capacity observed in our bystander suppressive T cell assays for this peptide.

**Supplement Figure S2.** Flow cytometry gating strategy for CD4 T cell proliferation and activation in the bystander suppression assays.

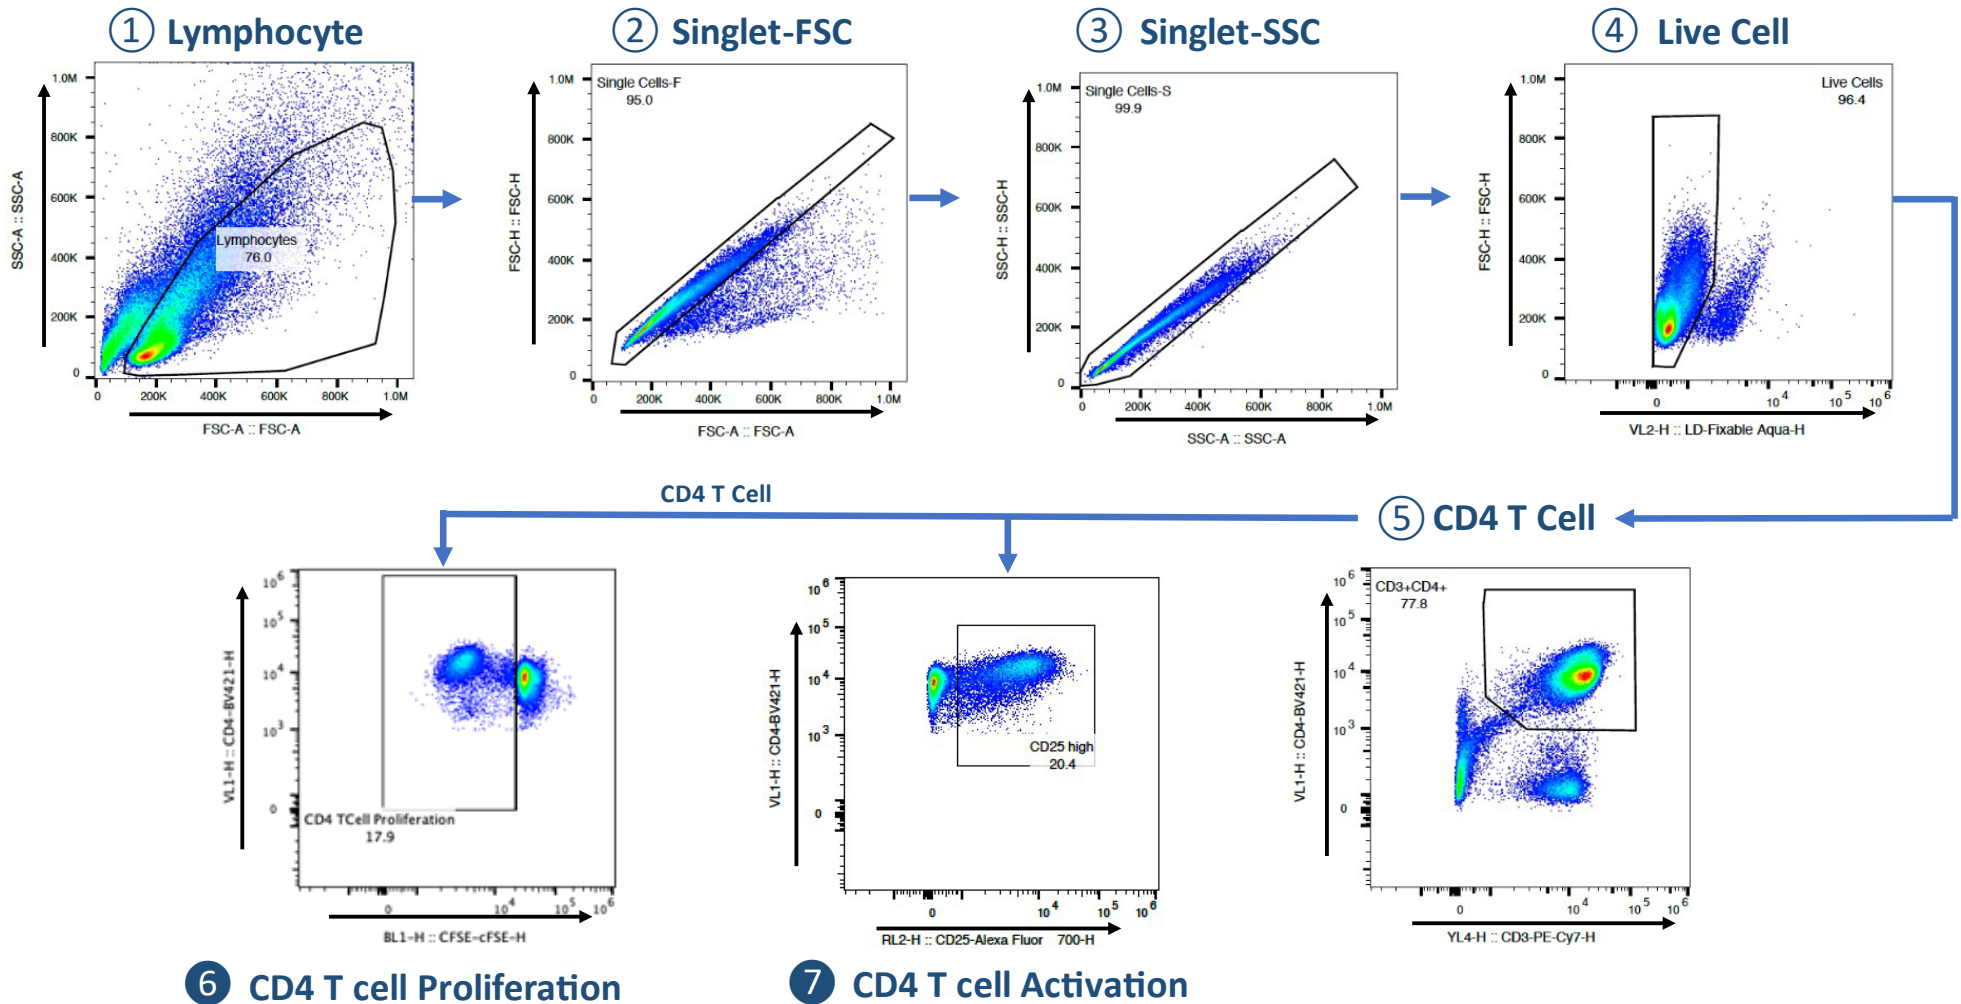

**Supplement Figure S2. Gating strategy for CD4 T cell proliferation and activation.** Healthy donors PBMCs were CFSE labelled at day0, then stimulated with 0.5  $\mu\text{g/ml}$  of TT at day1, cultured for 6 days and stained with cell surface markers to identify CD4 T cell proliferation and activation. Initially lymphocyte populations were selected in side scatter (SSC) vs forward scatter (FSC) and doublets were excluded by flow scatter height vs area and side scatter height vs area plotting. Dead cells were then removed by live-dead staining. CD4 + T cells were selected by CD3+CD4+ positive markers and proliferation of CD4 T cells determined by CFSE dilution. Activation of CD4 T cells population was determined by the expression of CD25.

**Supplement Figure S3.** Representative FACS plot showing dose-dependent inhibition of CD4 T cell activation.

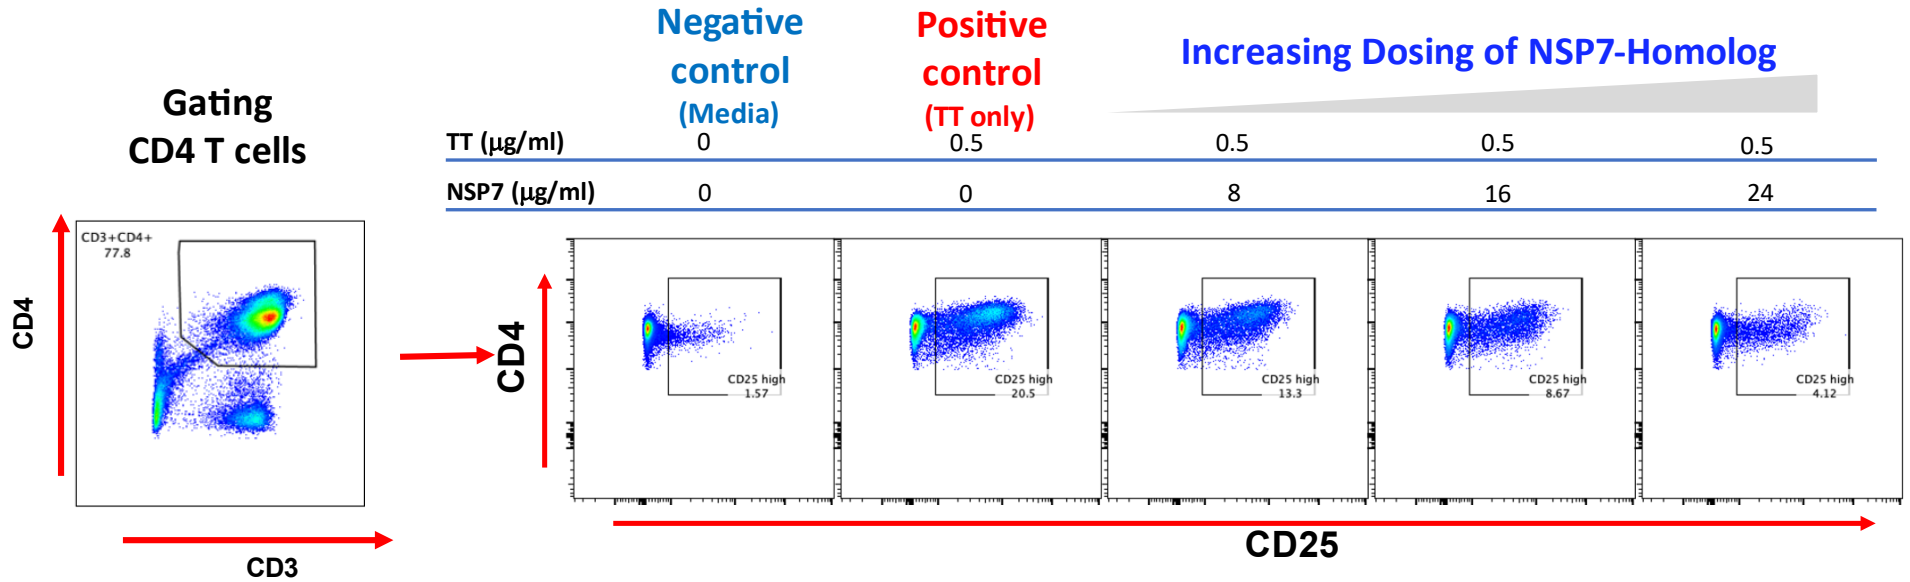

**Supplement Figure S3. FACS plot showing dose-dependent inhibition of CD4 T cell activation.** PBMC from healthy donors were stimulated with 0.5 µg/ml of TT with or without the addition of different concentrations of NSP7-Homolog peptide. Activation of CD4 T cells were measured six days post-stimulation by flow cytometry by the expression of activation marker CD25. FACS plot from a representative donor PBMC is shown here.
